# Supplementary material
Source: Springer Nature journal article supplement (https://www.springermedizin.de/resource/supplementary/12958_2009_551_MOESM9_ESM.pdf/9568294)
Supplement: MOESM9 [file 9568294]

Creation and maintenance  
utero - placental unit

Attenuated  
immunological reactivity

Exacerbated  
immunological reactivity

Adequate  
uterine vasculature

Immature or damaged  
uterine vasculature

Prostacyclin  
L-arginine -NO  
Bradykinin

Thromboxane  
ADMA  
B2R-AT1R dimers

Angiotensin -(1-7)  
Angiotensin II - AT2  
VEGF- flt1 - KDR

Angiotensin II - AT1  
VEGF - sflt1

Maternal  
hemodynamics

↑ Vasodilators  
↑ Plasma volume  
↑ Cardiac Index  
Normal  
endothelial function

↓ Vasodilators  
↓ Plasma volume  
↓ Cardiac Index  
Endothelial  
dysfunction

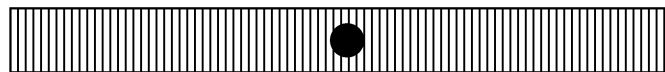

Normal pregnancy

Preeclampsia

Gestational adaptation
